# Supplementary material for: Wide-spectrum manipulation of triboelectrification-induced electroluminescence by long afterglow phosphors in elastomeric zinc sulfide composites
Source: Royal Society of Chemistry journal article supplement (doi:10.1039/c9tc00418a), 2019-01-01
Supplement: c9tc00418a1.pdf [file c9tc00418a1.pdf]

## Supporting Information

### Wide-Spectrum Manipulation of Triboelectrification-Induced Electroluminescence by Long Afterglow Phosphor in Elastomeric Zinc Sulfide Composite

Qian Cheng, Ying Wang, Li Su,\* Hailu Wang, Guang Zhu,\* and Wei Yu\*

| Samples | PL phosphor concentration in the composites (wt %) | G-EL (g) | B-PL (g) | R- PL (g) | PDMS (g) |
|---------|----------------------------------------------------|----------|----------|-----------|----------|
| 1 #     | 0                                                  | 1        | 0        | 0         | 5        |
| 2 #     | 40                                                 | 1        | 4        | 0         | 5        |
| 3 #     | 40                                                 | 1        | 0        | 4         | 5        |
| 4 #     | 40                                                 | 1        | 2        | 2         | 5        |
| 5 #     | 14                                                 | 1        | 1        | 0         | 5        |
| 6 #     | 25                                                 | 1        | 2        | 0         | 5        |
| 7 #     | 33                                                 | 1        | 3        | 0         | 5        |
| 8 #     | 14                                                 | 1        | 0        | 1         | 5        |
| 9 #     | 25                                                 | 1        | 0        | 2         | 5        |
| 10 #    | 33                                                 | 1        | 0        | 3         | 5        |

**Table S1** Sample conditions

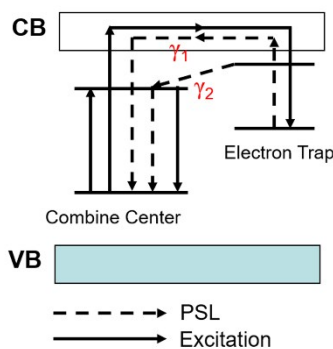

**Fig. S1** The scheme of PSL of the long afterglow materials

**Supplementary Movies 1-4** The blue, green, red and white strong lights are emitted in a large area by the color-tunable TIEL, respectively.
